# Supplementary material for: The French Connection: The First Large Population-Based Contact Survey in France Relevant for the Spread of Infectious Diseases
Source: PLOS journal article supplement (doi:10.1371/journal.pone.0133203), 2015-07-15

# Preschool children

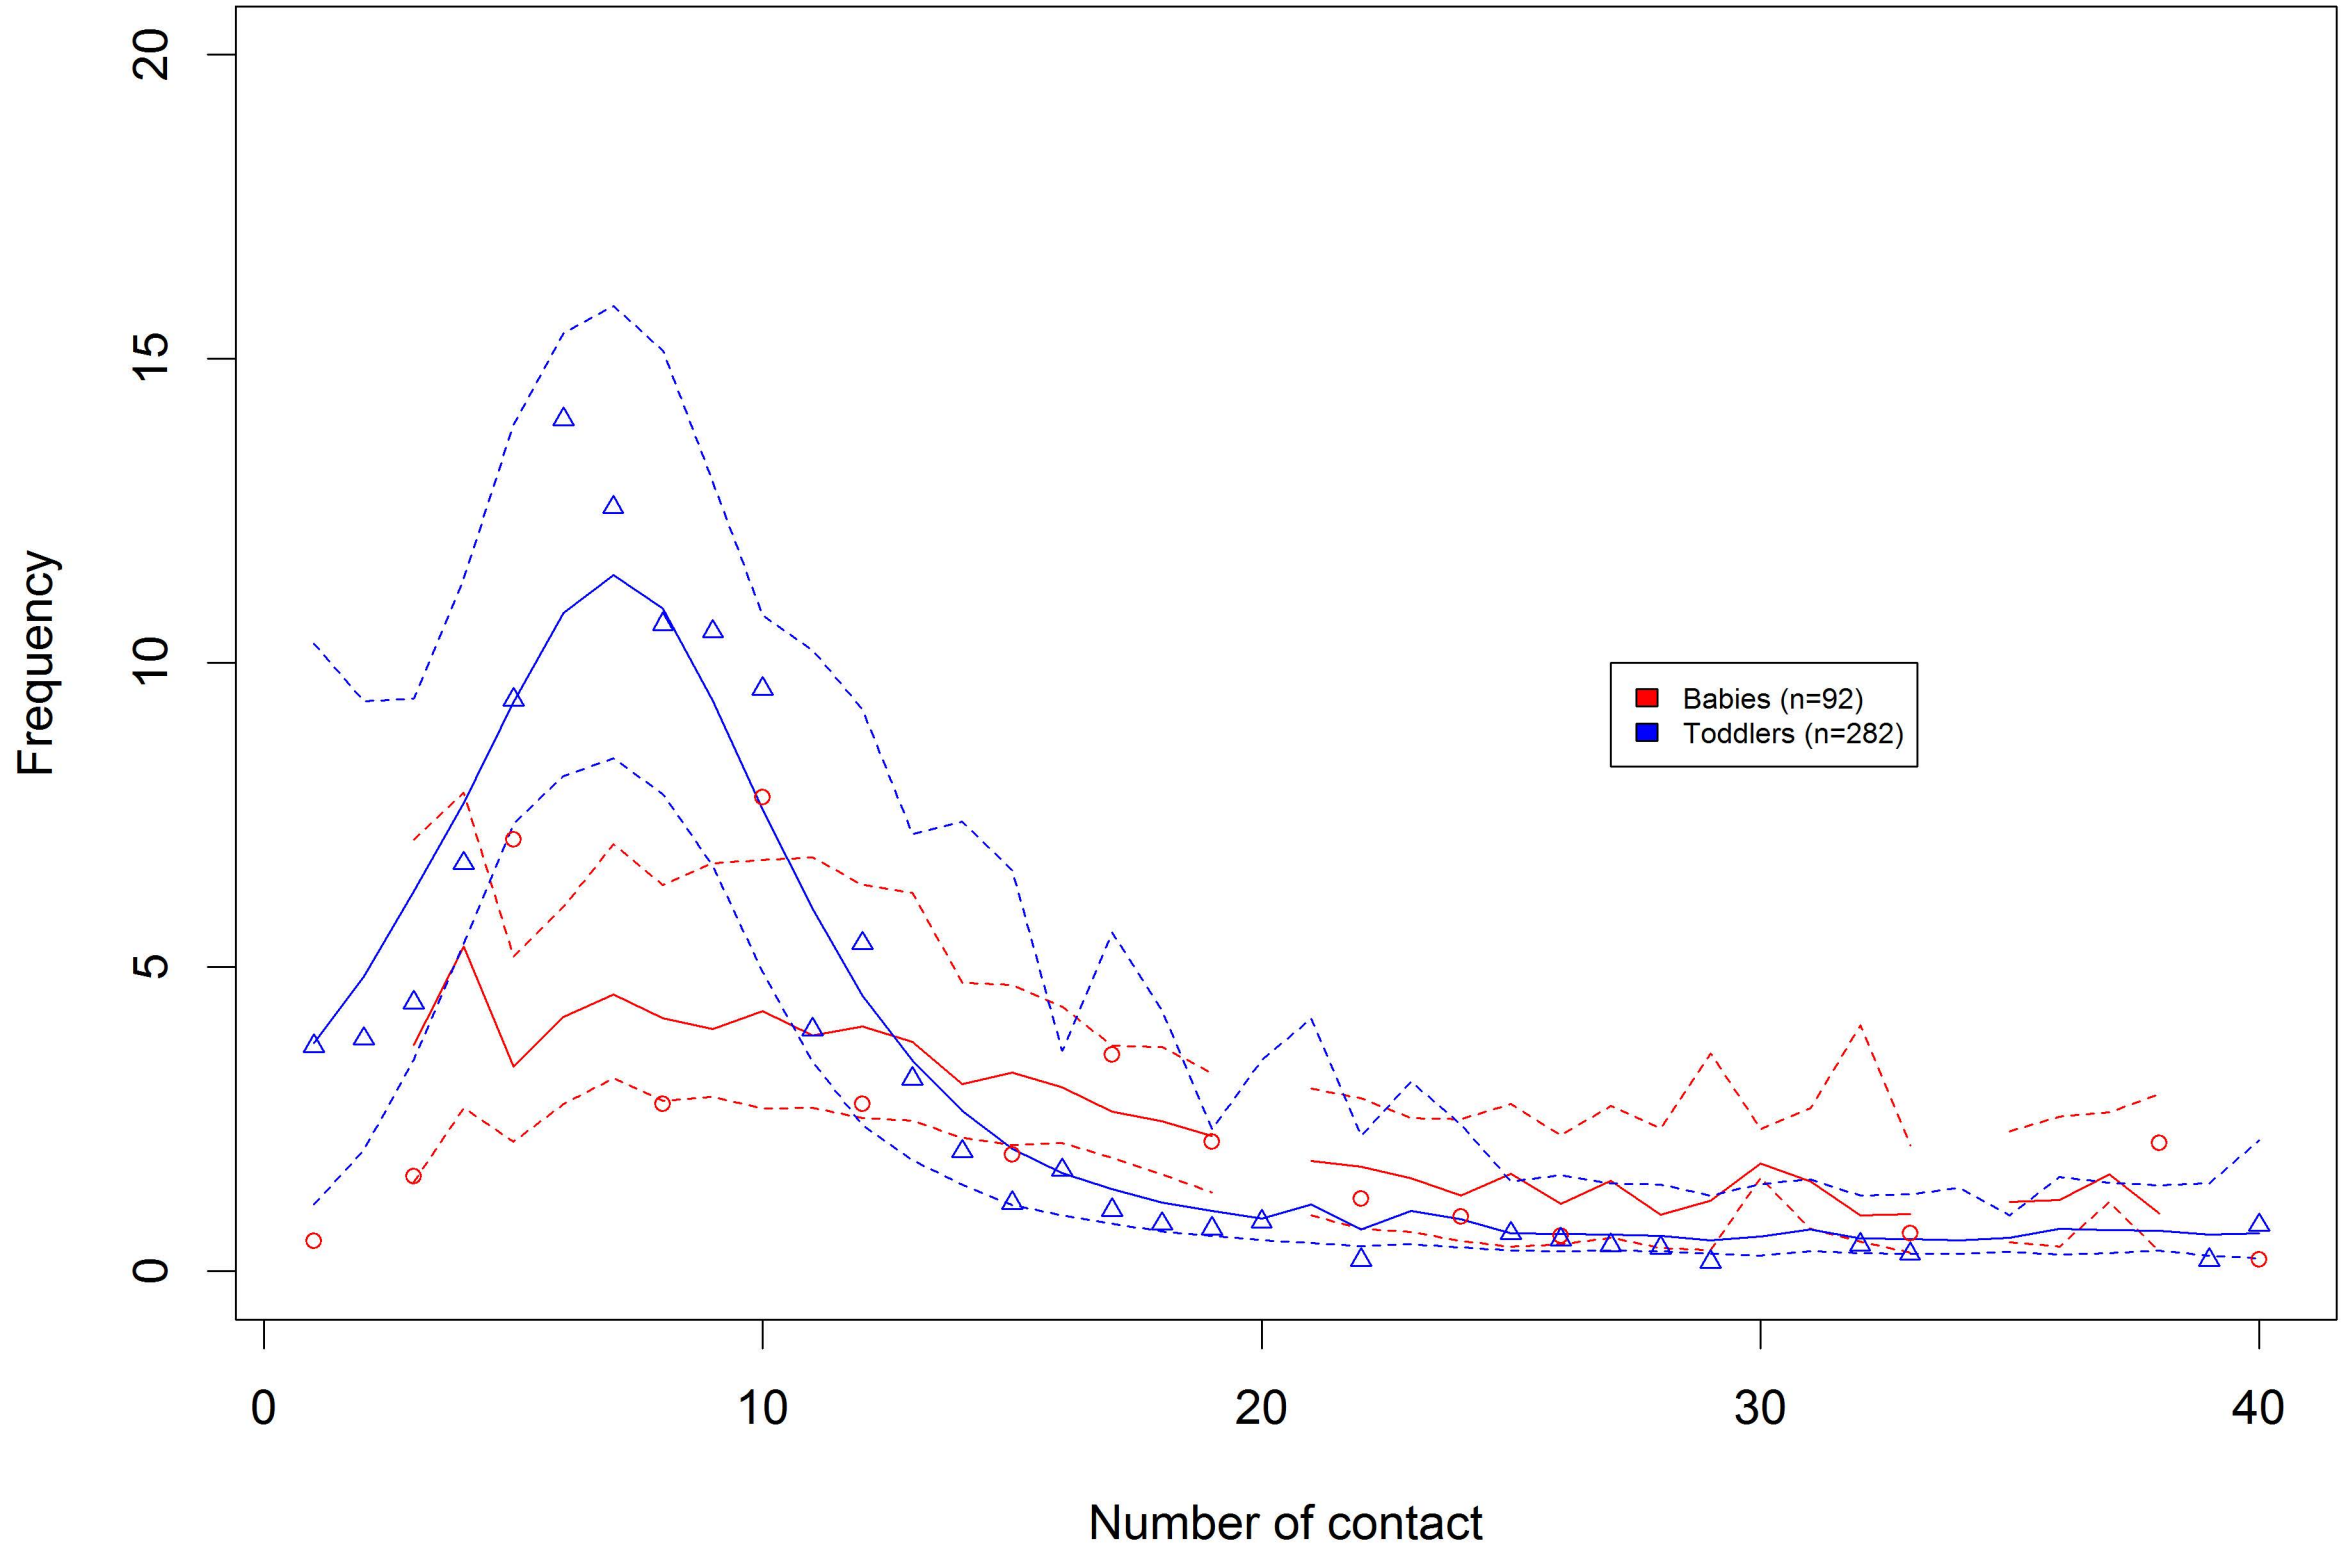

# Children

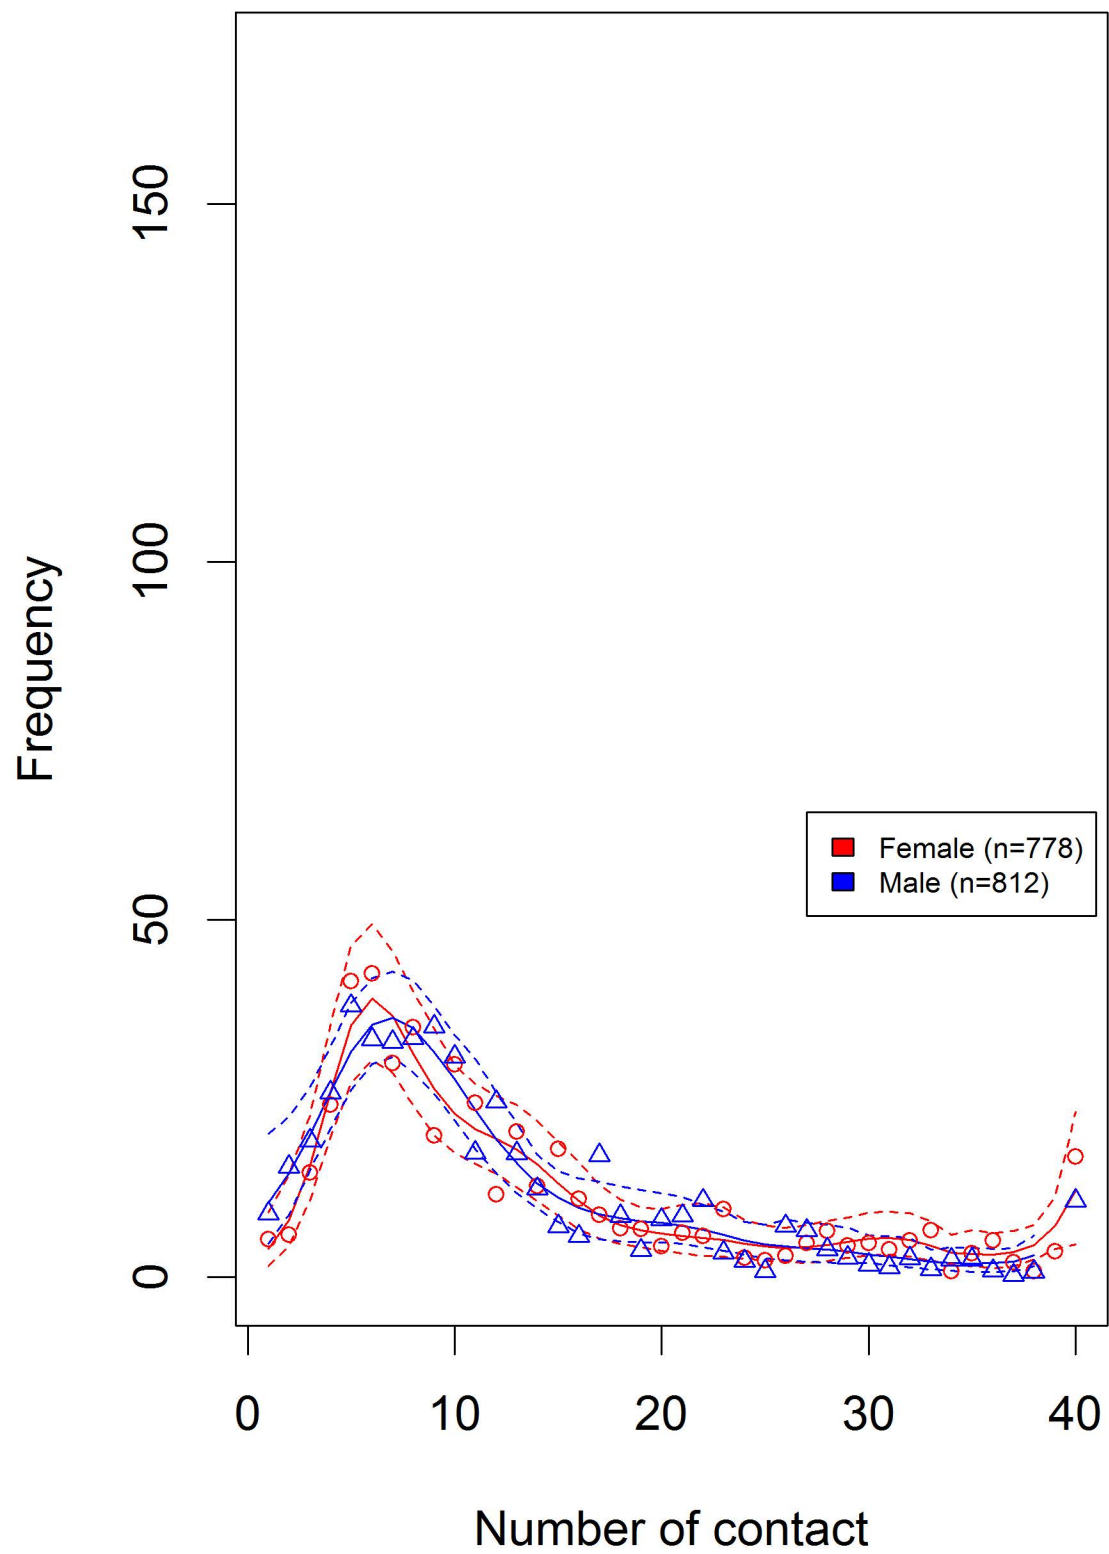

# Adult

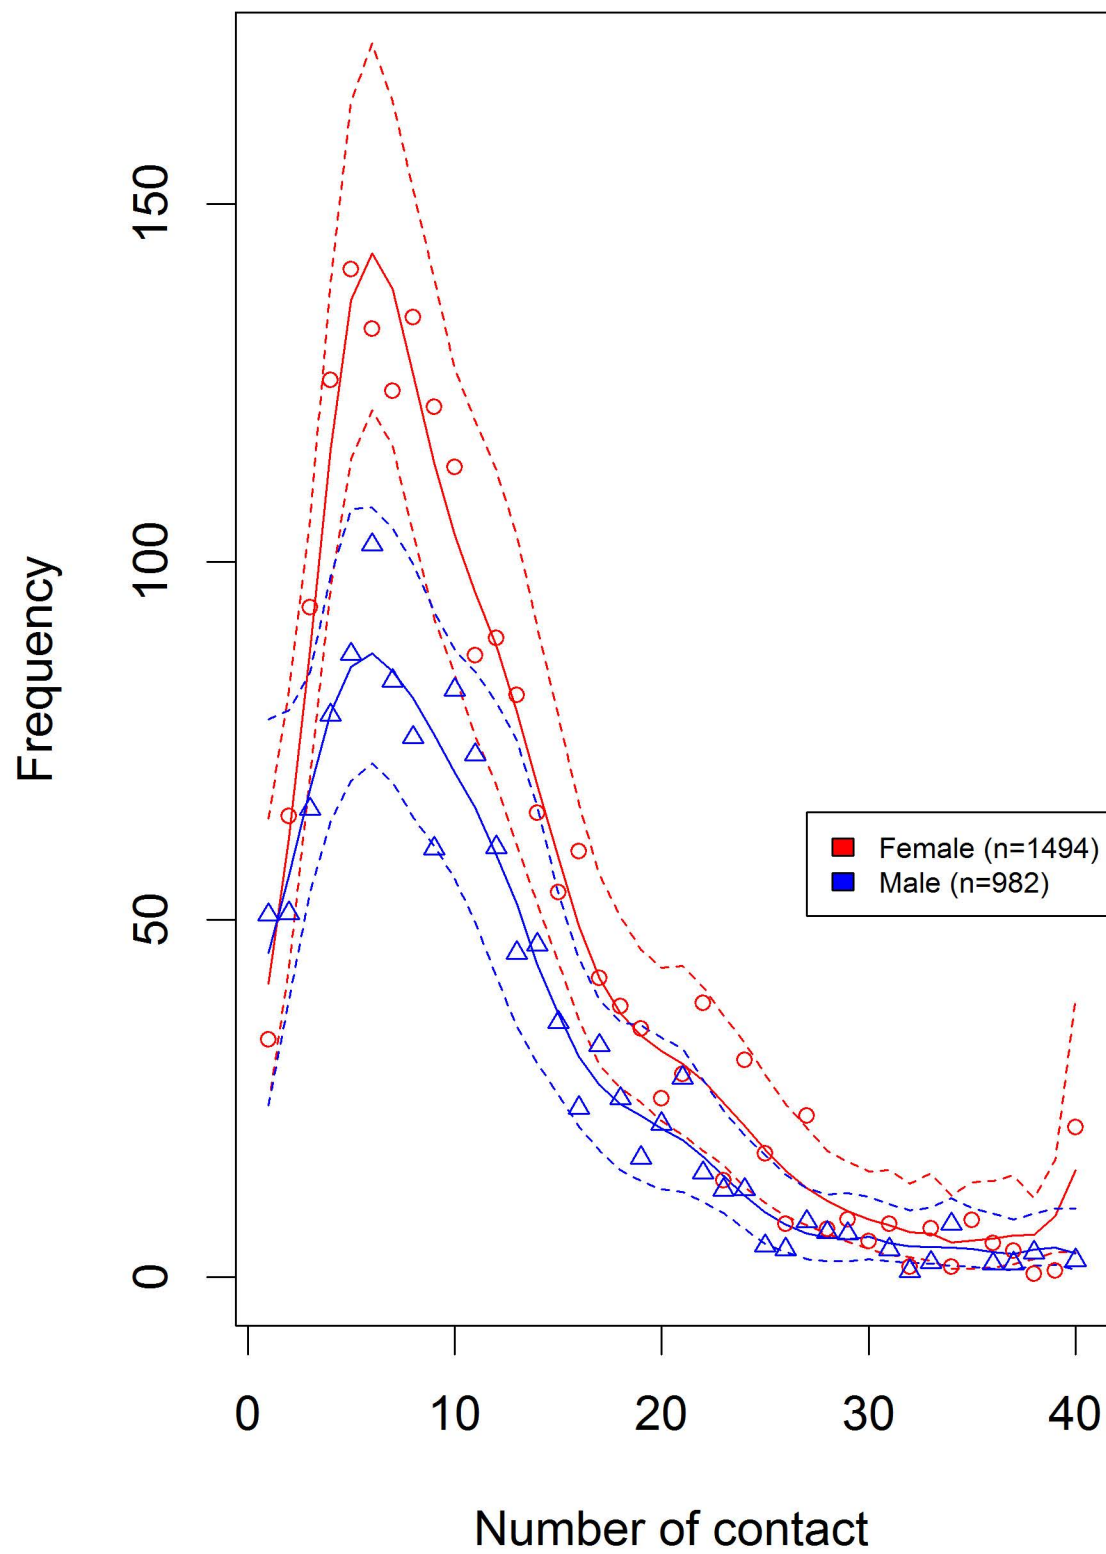

### Children (3-17y) & Holiday

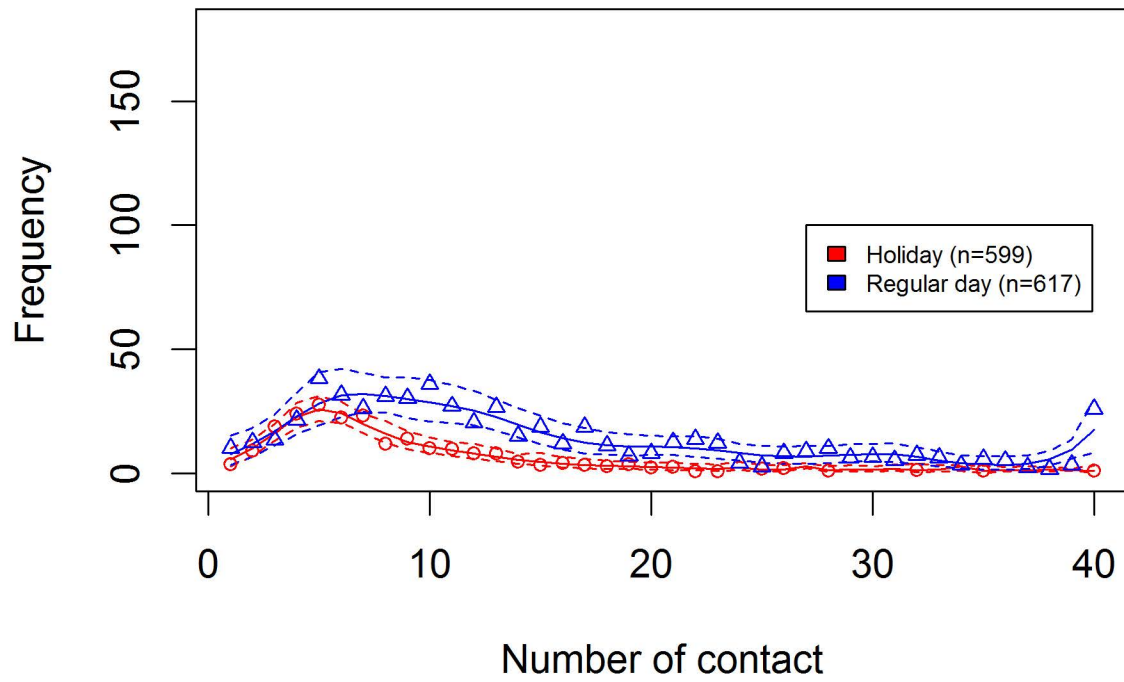

### Children (3-17y) & WeekEnd

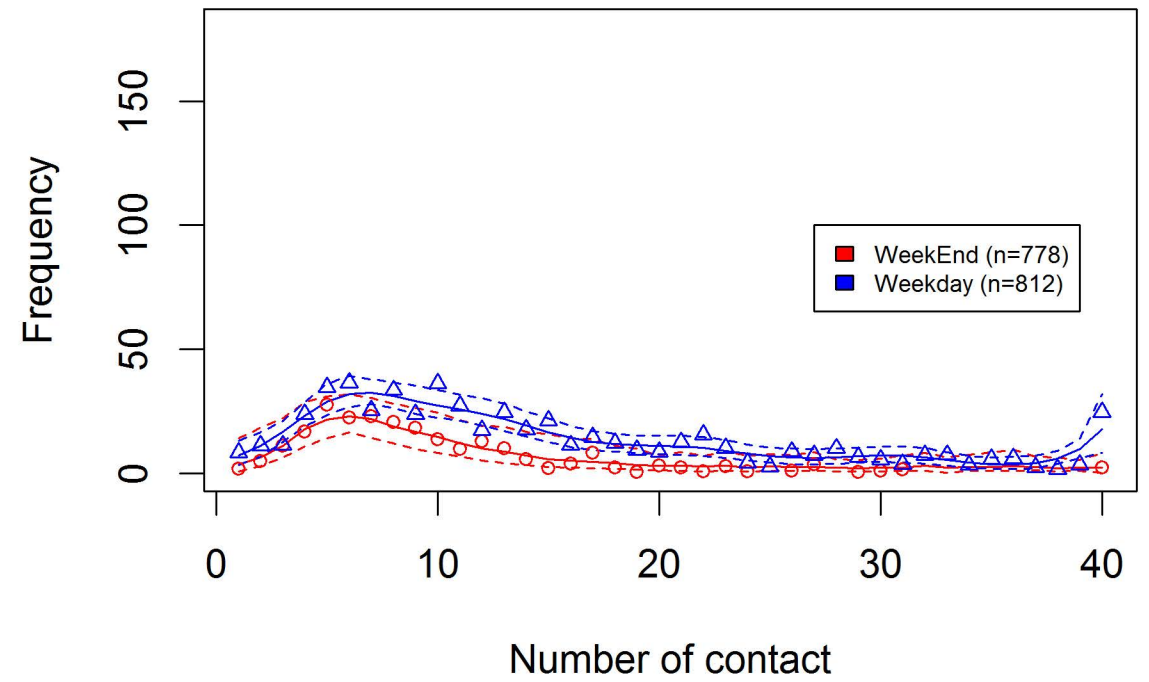

### Adults & Holiday

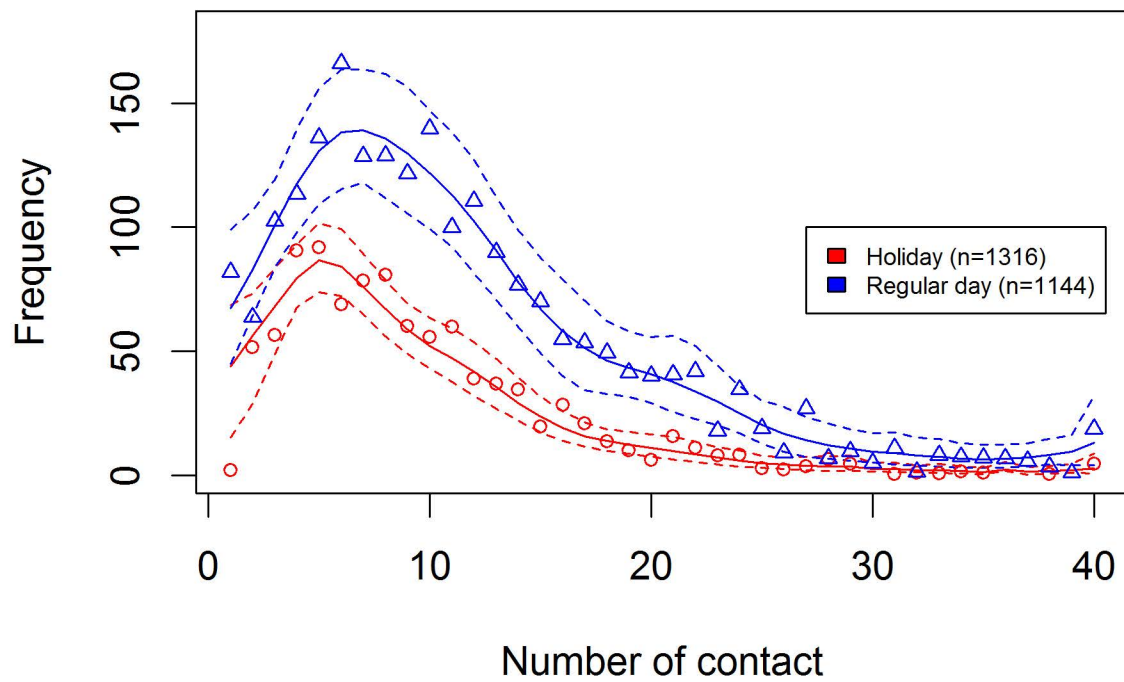

### Adults & WeekEnd

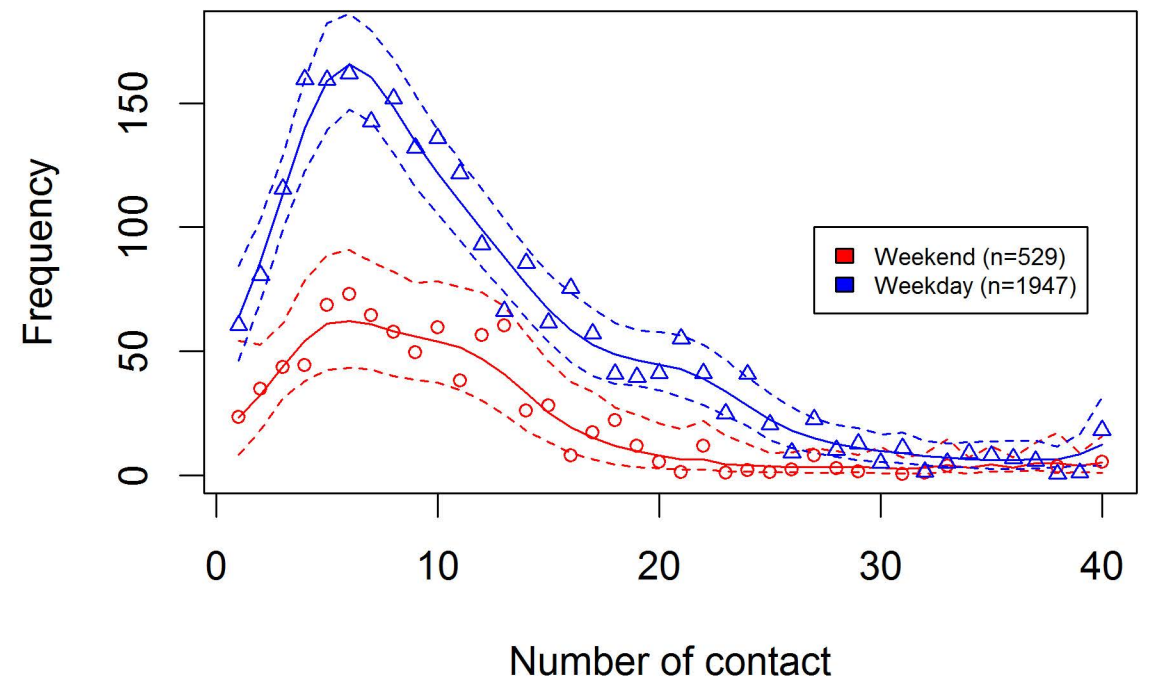

Supplement: S3 (10.1371/journal.pone.0133203.s003) [file journal.pone.0133203.s003]
